# Supplementary material for: Automatic identification and normalization of dosage forms in drug monographs
Source: BMC Med Inform Decis Mak. 2012 Feb 15;12:9. doi: 10.1186/1472-6947-12-9 (PMC3305679; doi:10.1186/1472-6947-12-9)
Supplement: Additional file 1 — A complete set of DFtree information. [file 1472-6947-12-9-S1.XLS]

## Sheet: Sheet1
RXCUI	TreeNum	DF_Name	Definition and Usage Note
316999	F1.1.1	Gas for Inhalation	a gas that can be breathed into the nose or mouth
346161	F1.1.1.1	Inhalant Solution	a solution intended to be inhaled
721654	F1.1.1.2	Metered Dose Inhaler	a liquid medication delivered as a mist to be inhaled as a measured dose
316959	F1.1.1.3	Nasal Inhalant	a medication intended to be inhaled through the nose
721655	F1.1.1.3.1	Nasal Inhaler	a medication delivered as a mist to be inhaled through the nose as a measured dose
317000	F1.1.2	Inhalant Powder	a powdered medication that is intended to be inhaled
744995	F1.1.2.1	Dry Powder Inhaler	a powdered medication inhaled as a measured dose
346163	F1.2.1	Mucosal Spray	a spray intended for use on the mucous membranes
126542	F1.2.2	Nasal Spray	a nasal solution intended for use in the nasal cavity delivered by a spray (see also Nasal Inhalant & Nasal Inhaler)
346164	F1.2.3	Oral Spray	a spray intended to be applied into the oral cavity
346165	F1.2.5	Topical Spray	a spray intended for use on the skin
317004	F1.2.5.1	Powder Spray	a powder delivered on the skin as a spray
317544	F2.1.2	Ophthalmic Cream	a cream intended for use in the eye
316966	F2.1.3	Oral Cream	a cream intended for use on or in the mouth
316975	F2.1.5	Rectal Cream	a cream intended for use in or around the rectum
316982	F2.1.6	Topical Cream	a cream intended to be used on the skin
848123	F2.1.6.1	Augmented Topical Cream	a cream with enhanced drug delivery capability
11103	F2.1.7	Vaginal Cream	a cream intended for use in or around the vagina
346284	F2.2.1	Oral Foam	a foam intended to be administered into the mouth
317542	F2.2.2	Rectal Foam	a foam intended for use in the rectum
346285	F2.2.3	Topical Foam	a foam intended for use on the skin
11107	F2.2.4	Vaginal Foam	a foam intended for use in the vagina
316955	F2.3.1	Medicated Liquid Soap	a liquid containing a detergent and a medication
106332	F2.3.2	Medicated Shampoo	a medicated liquid soap intended for use on hair
316984	F2.4.1	Topical Oil	an oil intended to be applied on the skin
757352	F2.5	Prefilled Applicator	a medication in an applicator delivered as a single measured dose
346161	F2.6.1	Inhalant Solution	a solution intended to be inhaled
316949	F2.6.2	Injectable Solution	a solution intended to be injected
316951	F2.6.2.1	Intraperitoneal Solution	a solution intended for use in the peritoneal cavity
721656	F2.6.2.2	Prefilled Syringe	a solution or suspension intended to be injected in a syringe, cartridge, or pen
152903	F2.6.3	Irrigation Solution	a solution intended for use as a flushing or rinsing agent
479172	F2.6.3.1	Douche	an irrigation solution intended for use in the vagina
317678	F2.6.3.2	Enema	an irrigation solution intended to cleanse the bowel or administer diagnostic drugs
244286	F2.6.3.3	Ophthalmic Irrigation Solution	an irrigation solution intended for use in the eye
316962	F2.6.4	Nasal Solution	a solution intended for use on the nasal mucosa
7670	F2.6.5	Ophthalmic Solution	a solution intended for use in the eye
316968	F2.6.6	Oral Solution	a solution intended to be taken by mouth. For solutions applied to the teeth, use Mouthwash.
7067	F2.6.6.1	Mouthwash	an oral solution intended to be used as a rinse or for irrigation. This includes oral solutions that are applied to the teeth.
316956	F2.6.6.2	Mucous Membrane Topical Solution	an oral solution intended for use on the mucous membranes
316973	F2.6.7	Otic Solution	a solution intended for use in the ear.
316986	F2.6.8	Topical Solution	a solution intended for use on a surface (do not use for Oral Solutions)
316950	F3.1	Injectable Suspension	a suspension administered by injection
721656	F3.1.1	Prefilled Syringe	a solution or suspension intended to be injected in a syringe, cartridge, or pen
316983	F3.2.1	Topical Lotion	a lotion intended for use on the skin
848124	F3.2.1.1	Augmented Topical Lotion	a lotion with enhanced drug delivery capability
316964	F3.4	Ophthalmic Suspension	a suspension intended for use in the eye
316969	F3.5	Oral Suspension	a suspension intended to be taken by mouth
316946	F3.5.1	Extended Release Suspension	a suspension that allows for a timed or controlled release of the solute
316974	F3.6	Otic Suspension	a suspension intended for use in the ear
316954	F4.1.1.1	Medicated Bar Soap	a bar of soap containing medication
316941	F4.1.2	Chewable Bar	a bar that can be broken down and crushed using the teeth
316960	F4.10.1	Nasal Gel	a gel intended for use on or in the nasal cavity
346169	F4.10.2	Oral Gel	a gel intended for use on or in the oral cavity
316963	F4.10.3	Ophthalmic Gel	a gel intended for use on or in the eye
346170	F4.10.4	Rectal Gel	a gel intended for use in or around the rectum
346286	F4.10.5	Topical Gel	a gel intended for use on the skin
848198	F4.10.5.1	Augmented Topical Gel	a gel with enhanced drug delivery capability
11108	F4.10.7	Vaginal Gel	a gel intended for use in or around the vagina
317690	F4.11	Granules	small bits that in large numbers form a larger entity
657710	F4.12	Drug Implant	a solid form inserted into the body that releases medication over time
316992	F4.13	Lozenge	a solid mass intended to be held in the mouth to allow for slow dissolution
797271	F4.14	Medicated Pad	a non-adhesive patch used to apply medication (see also Transdermal Patch)
797685	F4.15	Medicated Tape	an adhesive tape used to apply medication (see also Transdermal Patch)
316961	F4.16.1	Nasal Ointment	a ointment intended for use on or in the nose
91344	F4.16.2	Ophthalmic Ointment	a ointment intended for use on or in the eye
346288	F4.16.3	Oral Ointment	a ointment intended for use on or in the mouth
317005	F4.16.5	Rectal Ointment	a ointment intended for use on or in the rectum
316985	F4.16.6	Topical Ointment	a ointment intended for use on or in the skin
848125	F4.16.6.1	Augmented Topical Ointment	an ointment with enhanced drug delivery capability
317010	F4.16.7	Vaginal Ointment	a ointment intended for use on or in the vagina
704866	F4.17	Oral Strip	a medicated thin strip that dissolves - intended for oral use
858080	F4.17.1	Buccal Film	a film that adheres to the inner lining of the cheek until dissolved
402496	F4.18	Paste	a smooth, viscous mixture of material; semisolid in nature
346171	F4.18.1	Oral Paste	a paste to be taken or used orally
10652	F4.18.3	Toothpaste	a paste intended to be used in cleaning teeth
316987	F4.19.1	Transdermal Patch	an adhesive patch applied to the skin in order to administer a time-released dose of medication (see also Medicated Patch & Medicated Tape)
317691	F4.20	Pellet	a small rounded body
317000	F4.21.1	Inhalant Powder	a powdered medication that is intended to be inhaled
346289	F4.21.2	Oral Powder	a powder given orally, often sprinkled on or mixed with food. Not for powders mixed with liquids.
317009	F4.21.4	Topical Powder	a powder intended for use on the outside surface of the body
316978	F4.22.1	Rectal Suppository	a suppository intended to be inserted into the rectum
337840	F4.22.2	Vaginal Suppository	a suppository intended to be inserted into the vagina
317543	F4.22.3	Urethral Suppository	a suppository intended to be inserted into the urethra
317541	F4.23.1	Oral Tablet	a tablet containing medicated materials to be taken by mouth
970789	F4.23.1.1	Buccal Tablet	a tablet held in the hollow pockets of the cheek until dissolved
316980	F4.23.1.1.1	Sustained Release Buccal Tablet	a tablet held in the hollow pockets of the cheek while the slowed delivery system allows the drug to be released over an extended period of time at a controlled rate
91058	F4.23.1.2	Chewable Tablet	a tablet taken by mouth and crushed into smaller pieces before swallowing
316942	F4.23.1.3	Disintegrating Tablet	a tablet dissolved in the mouth to release medication
10312	F4.23.1.4	Enteric Coated Tablet	a coated tablet to ensure arrival in the small intestines by preventing the degradation of the dosage form in the stomach by stomach acid
316998	F4.23.1.4.1	Extended Release Enteric Coated Tablet	an enteric coated tablet with a slowed delivery system that allows medication to be released over an extended period of time at a controlled rate
316945	F4.23.1.5	Extended Release Tablet	a tablet whose contents are slowly released over an extended period of time at a controlled rate
316998	F4.23.1.5.1	Extended Release Enteric Coated Tablet	an enteric coated tablet with a slowed delivery system that allows medication to be released over an extended period of time at a controlled rate
317007	F4.23.1.6	Sublingual Tablet	a tablet held under the tongue until dissolved
11110	F4.23.2	Vaginal Tablet	a tablet that contains medicated materials to be inserted vaginally
11109	F4.24	Vaginal Ring	a pliable delivery system surrounded by a polymeric membrane that provides controlled drug release to the vagina
316989	F4.25	Wafer	a thin, cookie-like, baked form
317680	F4.3	Cake	a block of compressed or firm matter
316965	F4.4.1	Oral Capsule	a capsule taken by mouth
316995	F4.4.1.1	Enteric Coated Capsule	a coated capsule to ensure its arrival in the small intestines by preventing the degradation of the dosage form in the stomach by stomach acid
316943	F4.4.1.2	Extended Release Capsule	a capsule that allows medication to be released over an extended period of time at a controlled rate
402499	F4.6	Chewing Gum	an insoluble material that is chewed to release medication
446993	F4.7	Crystals	a solid, transparent, and colorless matter formed by a chemical element, compound, or mixture
316947	F4.9	Flakes	a collection of small, flat, thin, pieces of matter
